# Supplementary material
Source: PubMed Central journal article supplement (PMC9074970)
Supplement: cvab197_supplementary_data.pdf [file cvab197_supplementary_data.pdf]

## Online Supplementary Material

### **The EP300/TP53 Pathway, A Suppressor of the Hippo and Canonical WNT Pathways, is Activated in Human Hearts with Arrhythmogenic Cardiomyopathy in the Absence of Overt Heart Failure**

Leila Rouhi\*1, Siyang Fan\*1, Sirisha M. Cheedipudi1, Aitana Braza-Boils2,3, Maria Sabater4, Yan Yao5, Matthew R. Robertson6, Cristian Coarfa6, Juan R. Gimeno3,7, Pilar Molina2,8 Priyatansh Gurha1, Esther Zorio2,3,9#, AJ Marian1#

1. Center for Cardiovascular Genetics, Institute of Molecular Medicine and Department of Medicine, University of Texas Health Sciences Center at Houston, Texas 77030
2. Unidad de Cardiopatías Familiares, Muerte Súbita y Mecanismos de Enfermedad (CaFaMuSMe). Instituto de Investigación Sanitaria La Fe, Valencia, Spain.
3. Center for Biomedical Network Research on Cardiovascular Diseases (CIBERCV), Madrid, Spain.
4. Cardiogenetic Laboratory. Instituto Murciano de Investigación Biosanitaria. Murcia. Spain
5. Fuwai Hospital, Peking Union Medical College, Beijing, PR China
6. Department of Cell Biology. Baylor College of Medicine, Houston, TX, 77030
7. Unidad CSUR Cardiopatías Familiares, Hospital Universitario Virgen de la Arrixaca. Murcia
8. Instituto de Medicina Legal y Ciencias Forenses de Valencia, and Histology Unit at the Universitat de València, Spain
9. Unidad de Cardiopatías Familiares, Servicio de Cardiología, Hospital Universitario y Politécnico La Fe, Valencia, Spain.

\* Co-first authors

# Co-senior authors

**Short title:** EP300, Hippo, and WNT Pathways in ACM

#### **Correspondence:**

AJ Marian, M.D.  
Center for Cardiovascular Genetics  
6770 Bertner Ave, Suite C900A  
Houston, TX 77030  
713 500 2350  
[Ali.J.Marian@uth.tmc.edu](mailto:Ali.J.Marian@uth.tmc.edu)  
[ORCID: 0000-0002-1252-7120](https://orcid.org/0000-0002-1252-7120)

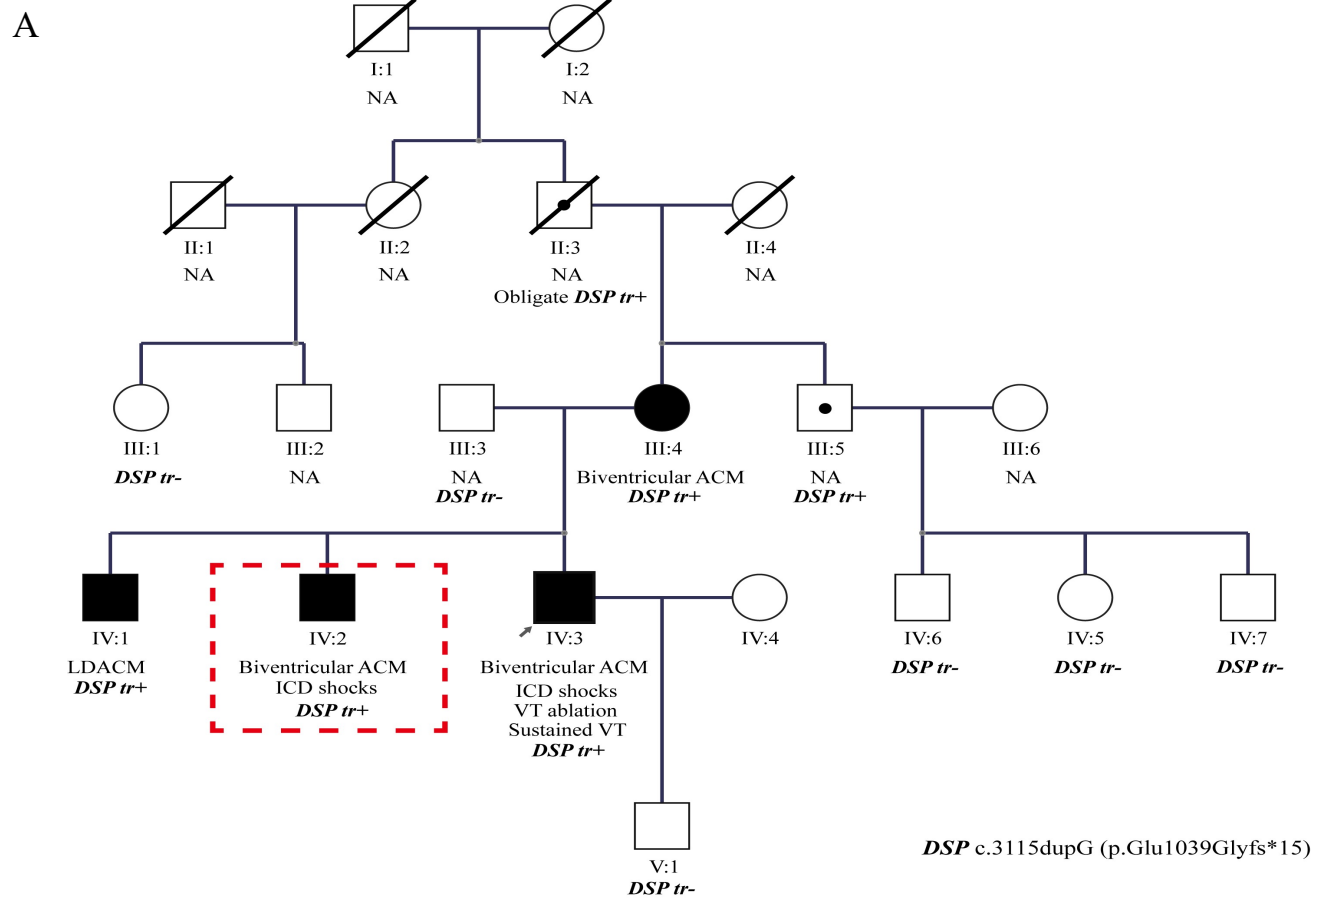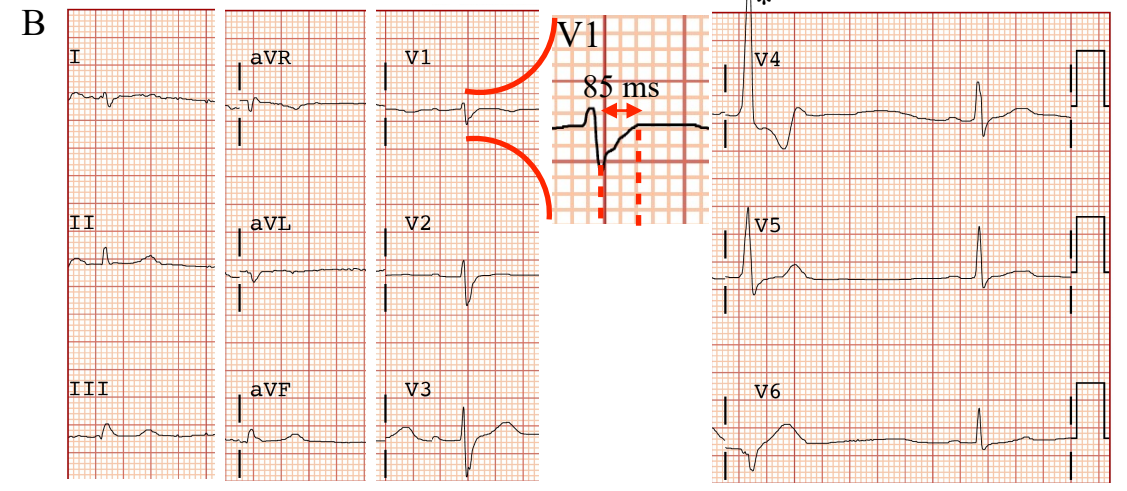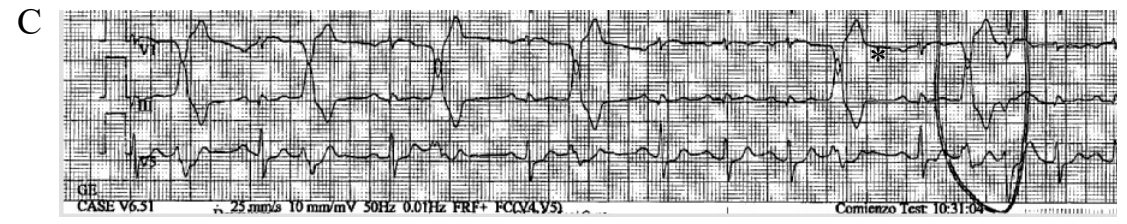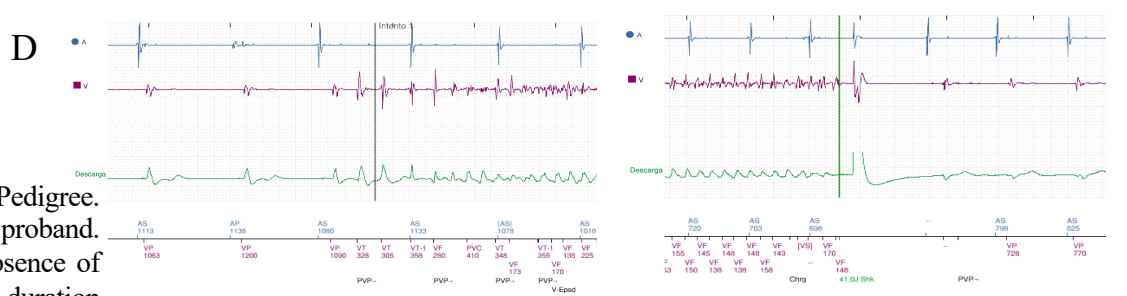

**Online Figure 1: Phenotypic characteristics of patient 1 (discovery group)**

**A.** Pedigree. The patient position in the pedigree is highlighted in a dashed red square. The mutation is listed in the Pedigree. Squares and circles represent males and females. Crossed symbols denote deceased individuals. An arrow points to the proband. Solid black symbols reflect the ACM phenotype with structural abnormalities at the MRI. White symbols reflect absence of ACM at cardiac imaging or unknown cardiac phenotype. **B.** ECG showing low voltages (limb leads), terminal activation duration of QRS 85 ms, and a ventricular extrasystole (\*). **C.** ECG tracing from the recovery period of an exercise test showing ventricular bigeminy originated at the right ventricular outflow tract and a polymorphic ventricular couplet. **D.** Recordings from an appropriate ICD therapy due to VF causing atrioventricular dissociation, terminated with a successful electric shock. **E.** CMR showing subepicardial LGE at the inferoseptum, inferior, and anterolateral left ventricular walls with a non dilated right ventricle. **F.** Echocardiogram showed preserved left and right ventricular systolic function, and normal TAPSE.

**Abbreviations:** NA: not available. *DSP tr*: desmoplakin truncating mutation; +:mutation is present; -:mutation is absent; ACM: arrhythmogenic cardiomyopathy; LDACM: left dominant arrhythmogenic cardiomyopathy; ICD: implanted cardioverter-defibrillator; VT: ventricular tachycardia; MRI: magnetic resonance imaging; ECG: electrocardiogram; VF: ventricular fibrillation; CMR: cardiac magnetic resonance; LGE: late gadolinium enhancement. TAPSE: tricuspid annular plane systolic excursion

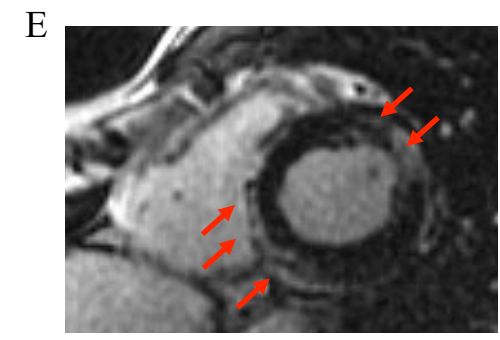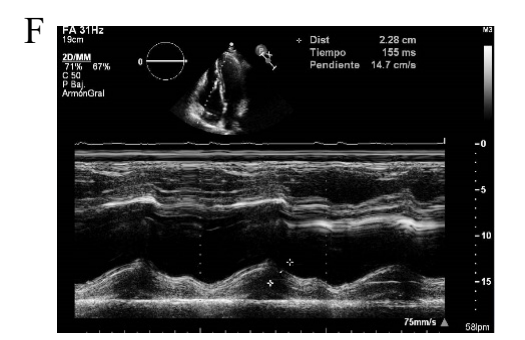

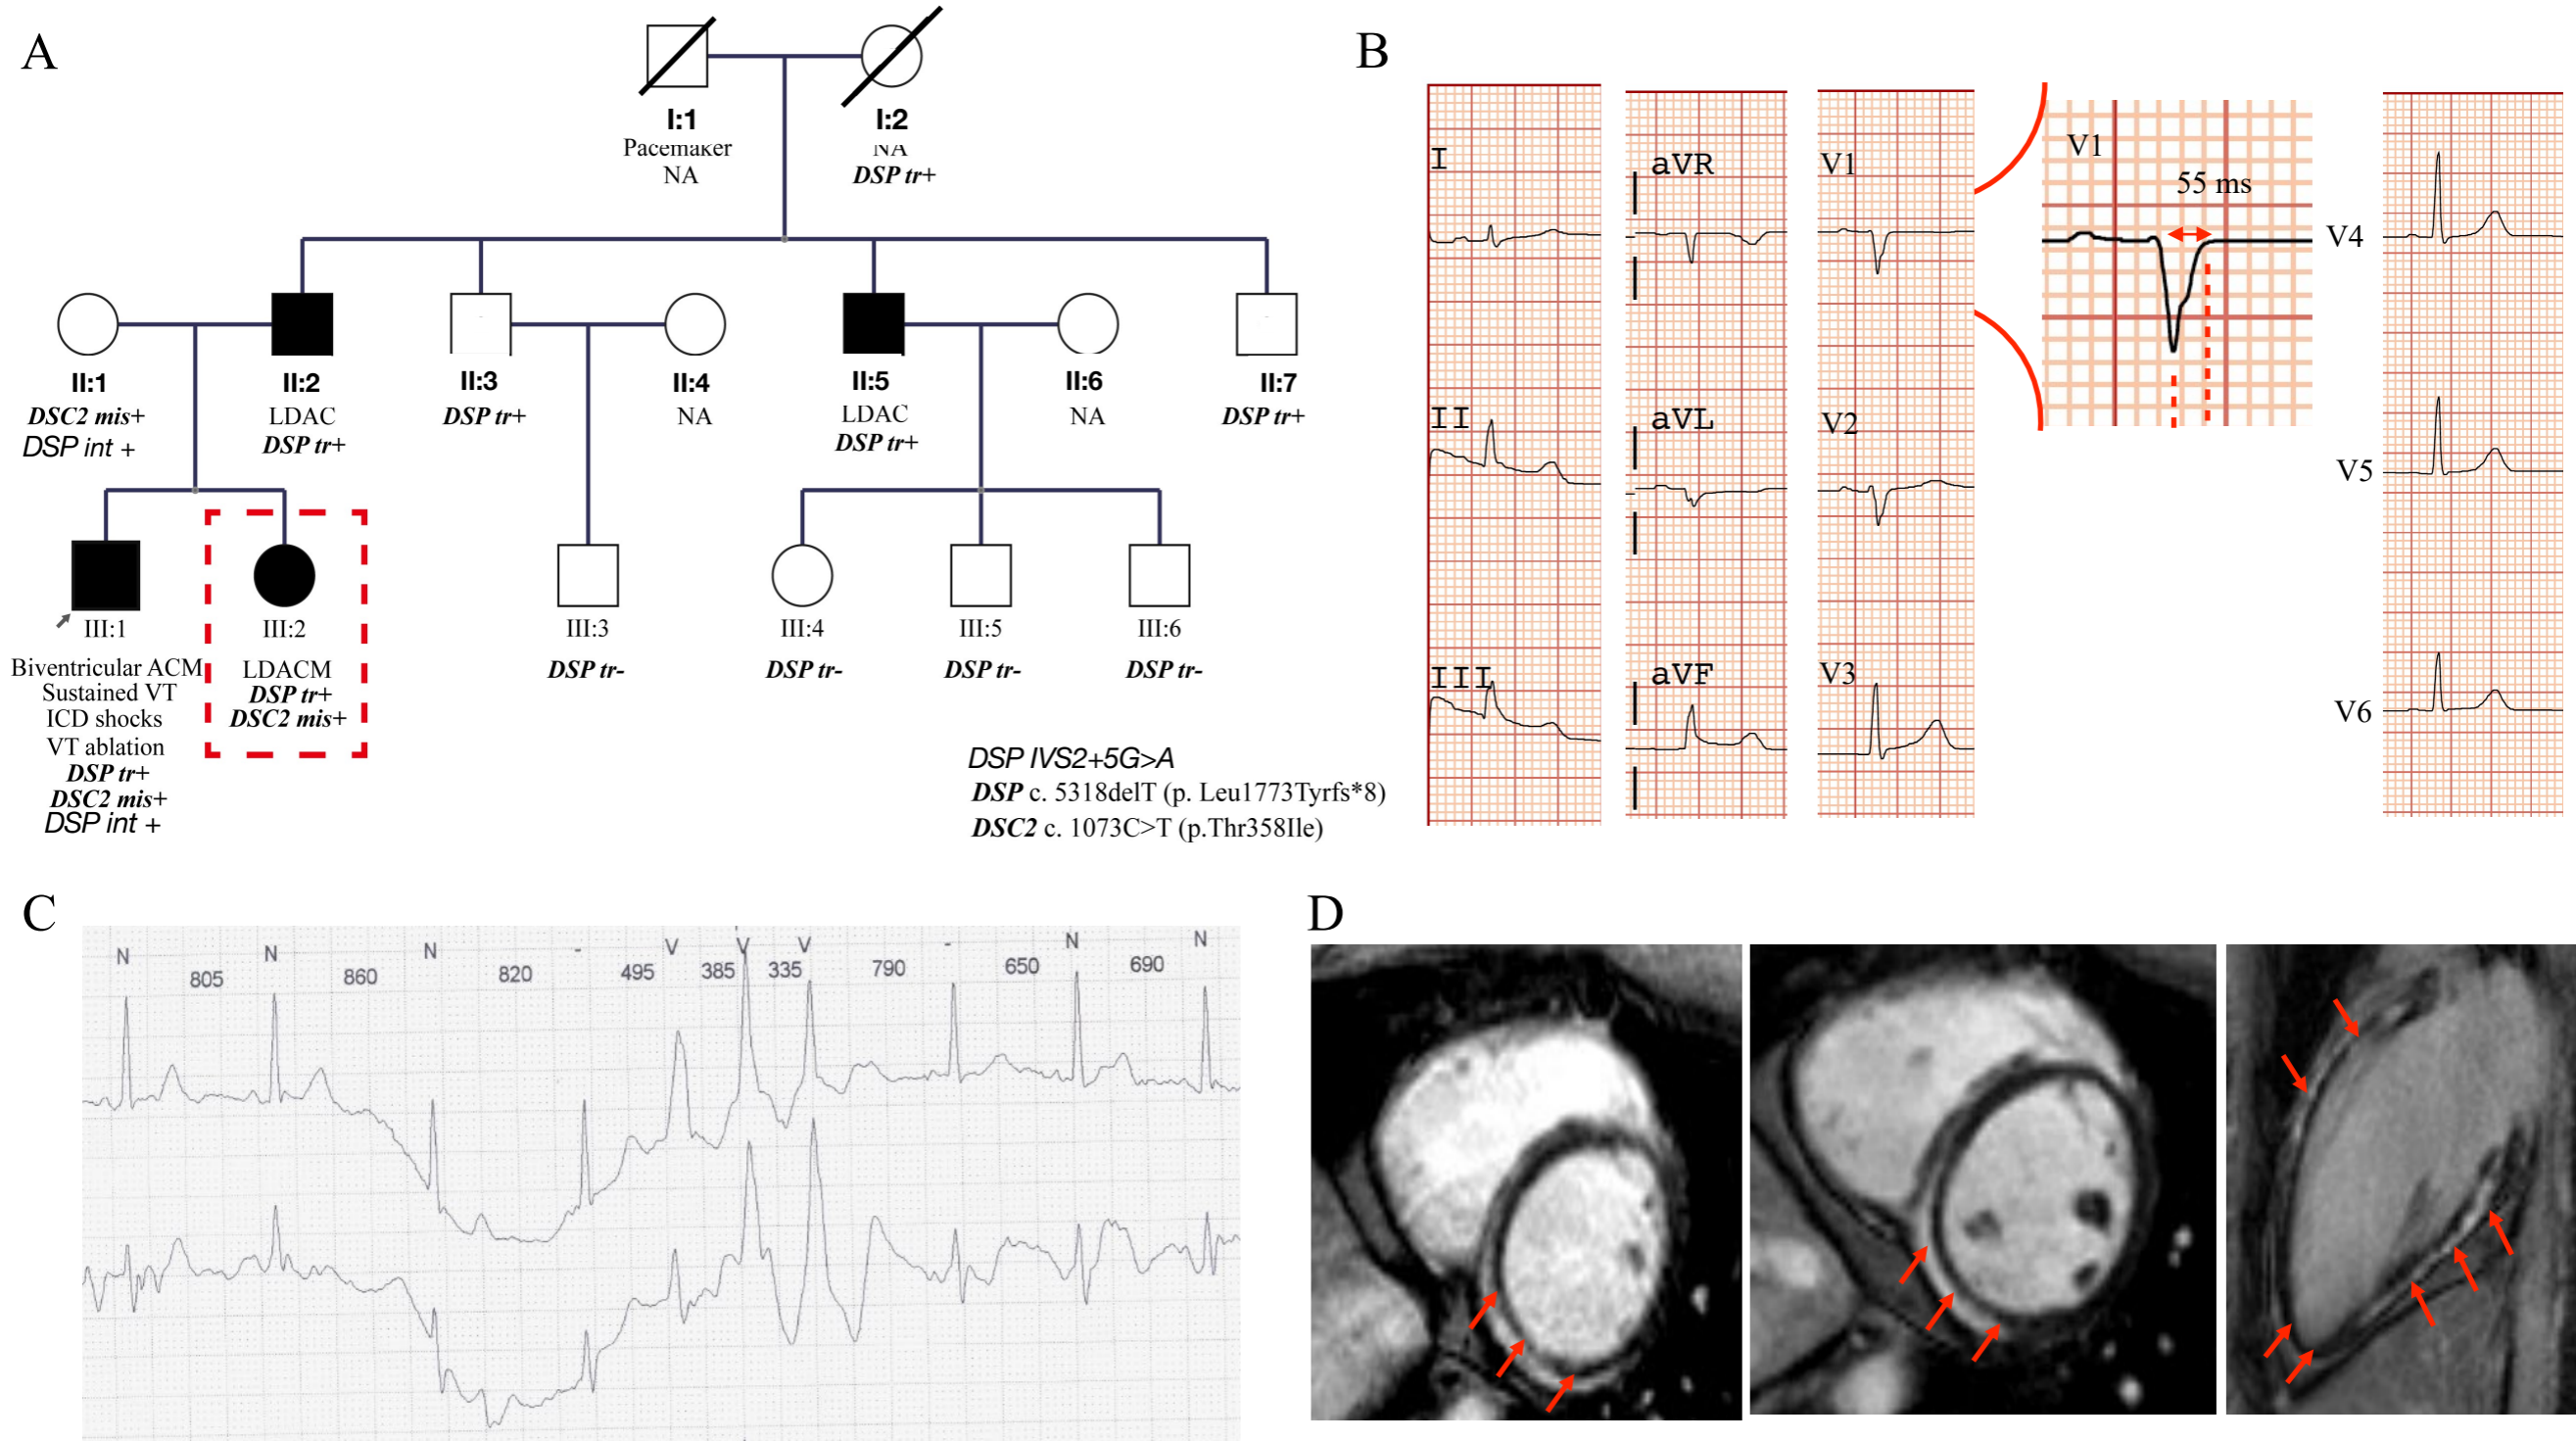

**Online Figure 2: Phenotypic Characteristics of patient 2 (discovery group)**

A. Pedigree. Symbols similar to those in Figure 1.

B. ECG showing low voltages (limb leads), and terminal activation duration of QRS 55 ms.

C. ECG tracing from a Holter monitor recording showing a non-sustained VT run.

D. Cardiac imaging showing widely extended subepicardial LGE at the left ventricle with non dilated right ventricle at the MRI (arrows).

Abbreviations: *DSP tr*: Desmoplakin truncating mutation; *DSC2 mis*: Desmocollin-2 missense mutation; *DSP int*: Desmoplakin intronic variant. Other abbreviations are as in online Figure 1

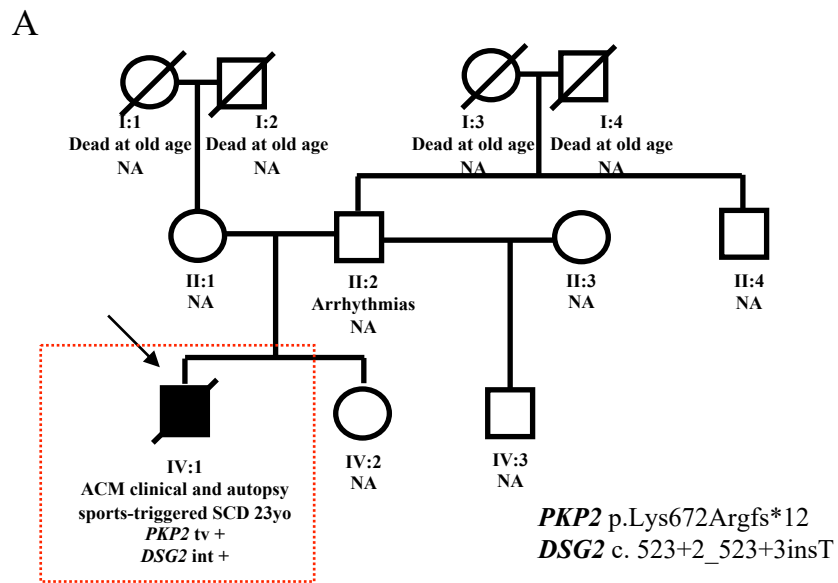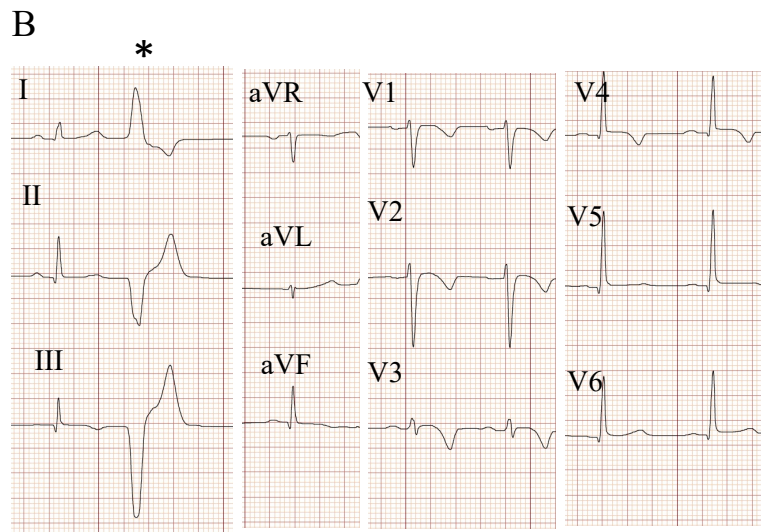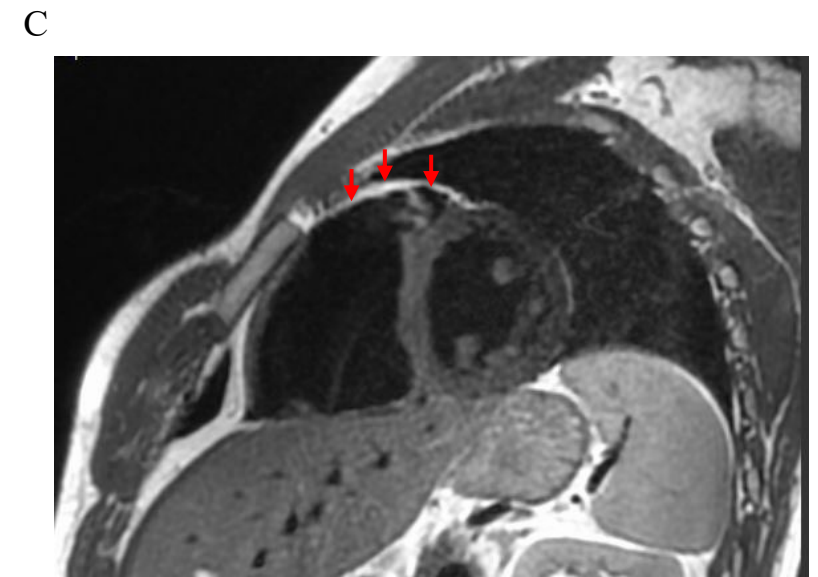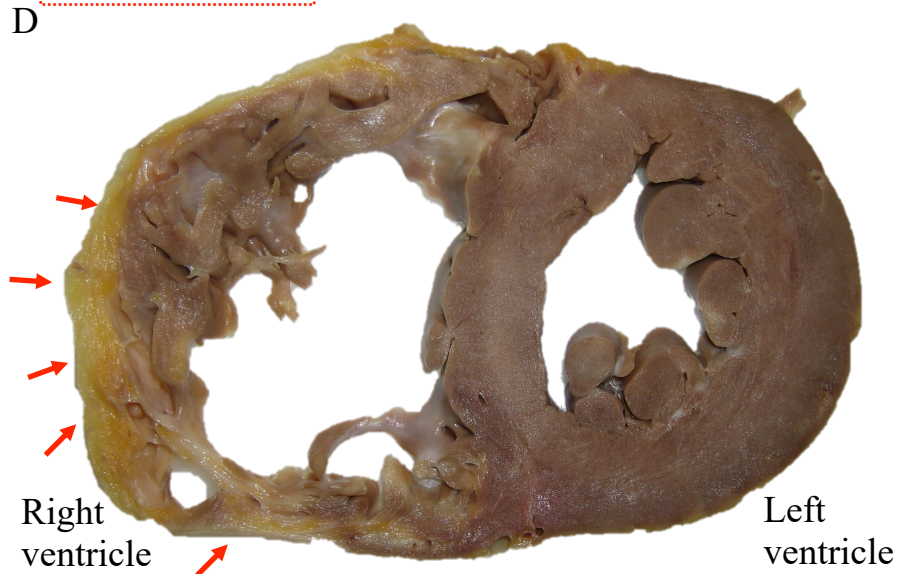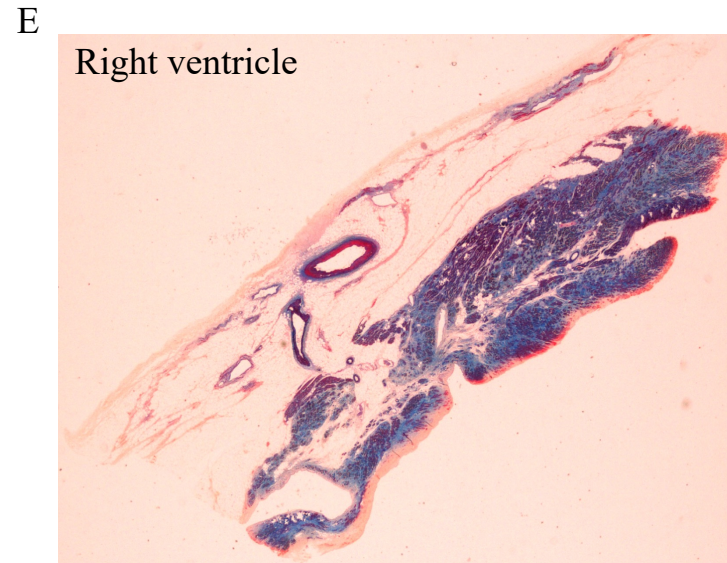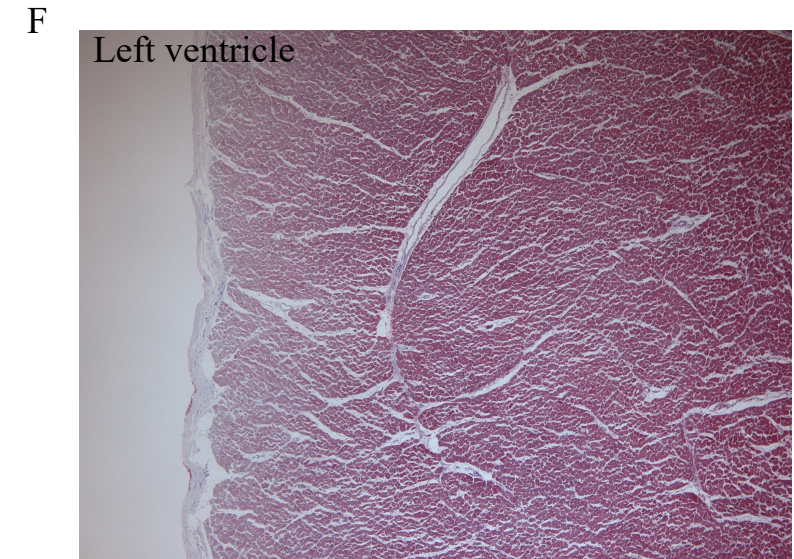

**Online Figure 3. Phenotypic characteristics (replication group):** **A.** Pedigree. The proband was presented with syncope and was diagnosed with ACM but continued sport activities. Symbols similar to Online Figure 1. **B.** 12-lead electrocardiogram showing a ventricular extrasystole (\*) and negative T waves at V1-4. **C.** CMR showing evidence of fatty infiltration at the anterior wall of the right ventricle (arrows). **D.** Cross-sectional view of the heart showing fatty infiltration (arrows), a dilated right ventricle and a normal left ventricle. **E and F.** Microscopic images of the right and left ventricles respectively, showing extensive fibrofatty infiltration of the right ventricle but not the left ventricle (Masson trichrome stained sections). **Abbreviations:** *PKP2* *tr*: Plakophilin-2 truncating mutation. *DSG2* *int*: Desmoglein-2 intronic mutation. SCD: sudden cardiac death. Other abbreviations as in Online Figure 1 Legend.

A

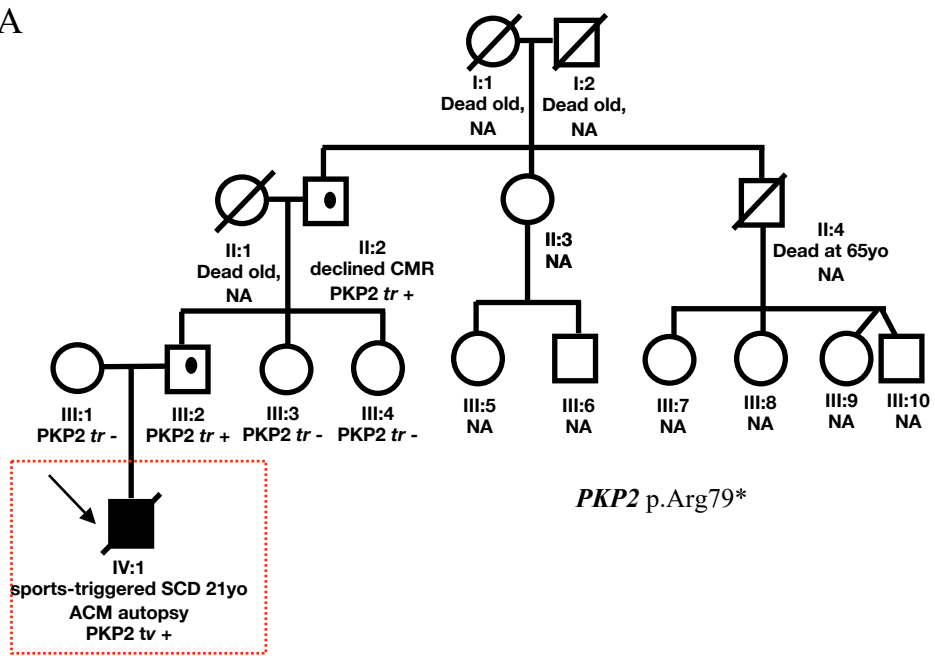

B

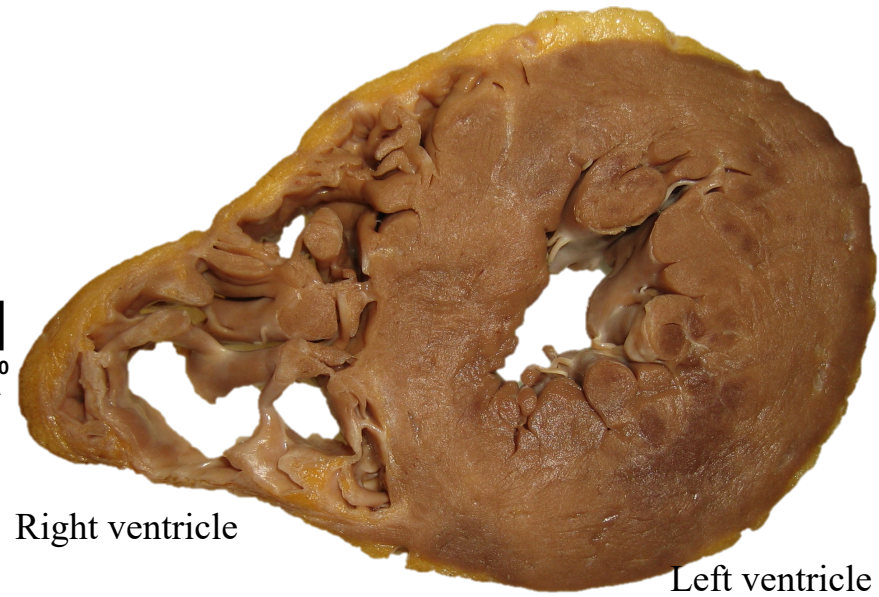

**Online Figure 4: Phenotypic characteristics (validation population):**

**A. Pedigree;** The proband was a 21-year old apparently healthy male without a prior history of cardiovascular disease, who died suddenly during sport activities.

**B.** Gross morphological cross section of the heart showing thinning of the right ventricular wall and fatty infiltration. The left ventricle appears normal.

**C and D.** Low and high magnification fields showing extensive fibro-adipogenesis involving the right ventricle.

**E.** Thin myocardial section from the left ventricle showing epicardial fat and mild interstitial fibrosis at the epicardium. Pathogenic variant p.Arg79Ter (c.235C>T) in the *PKP2* gene was identified.

Abbreviations as in online Figure 1

C

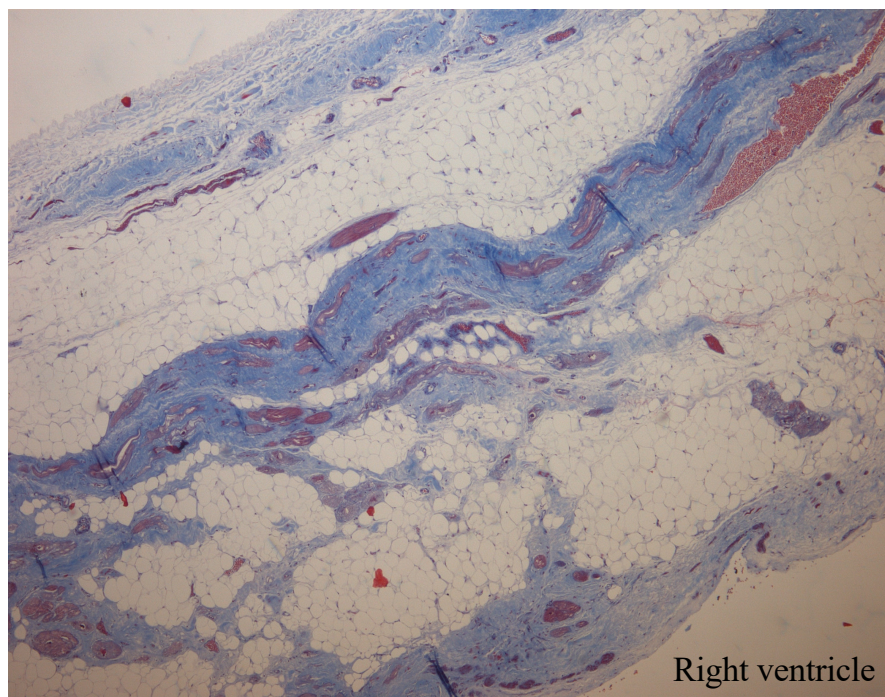

D

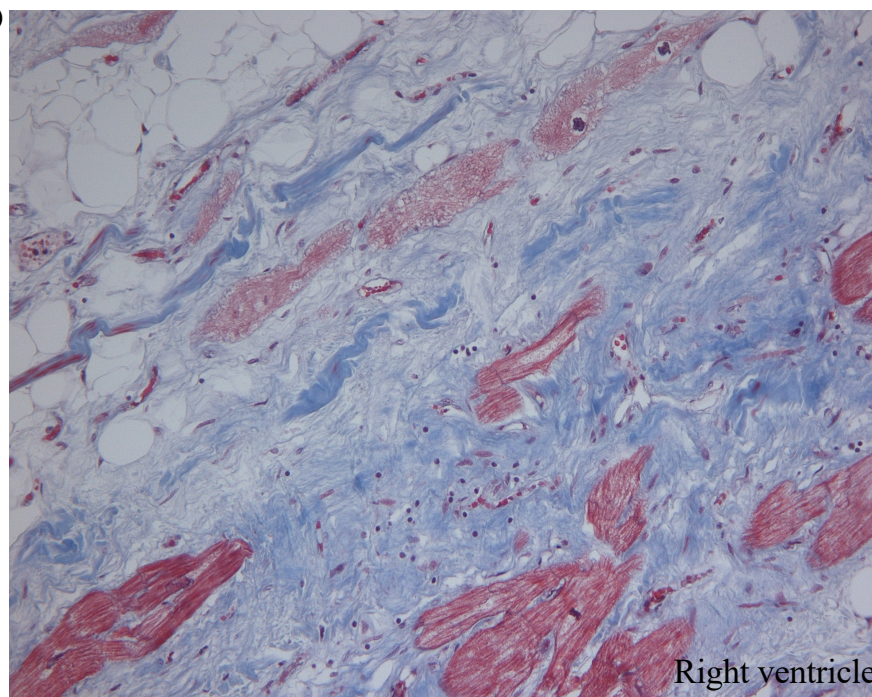

E

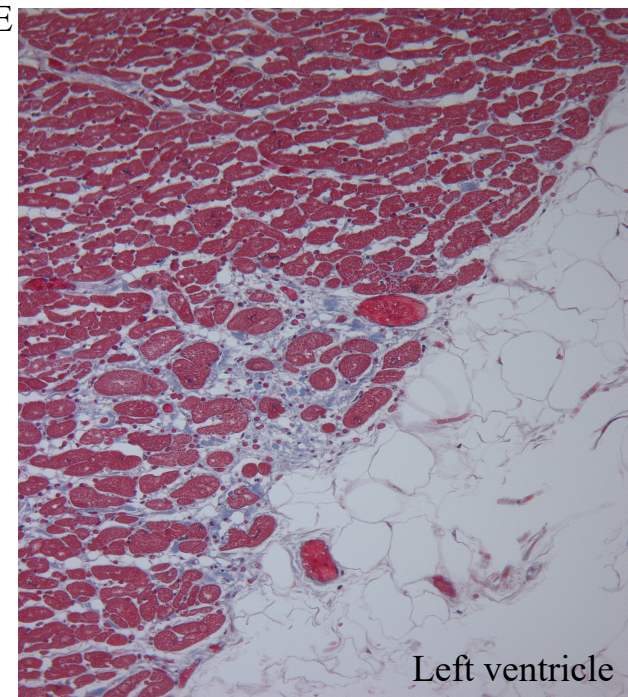

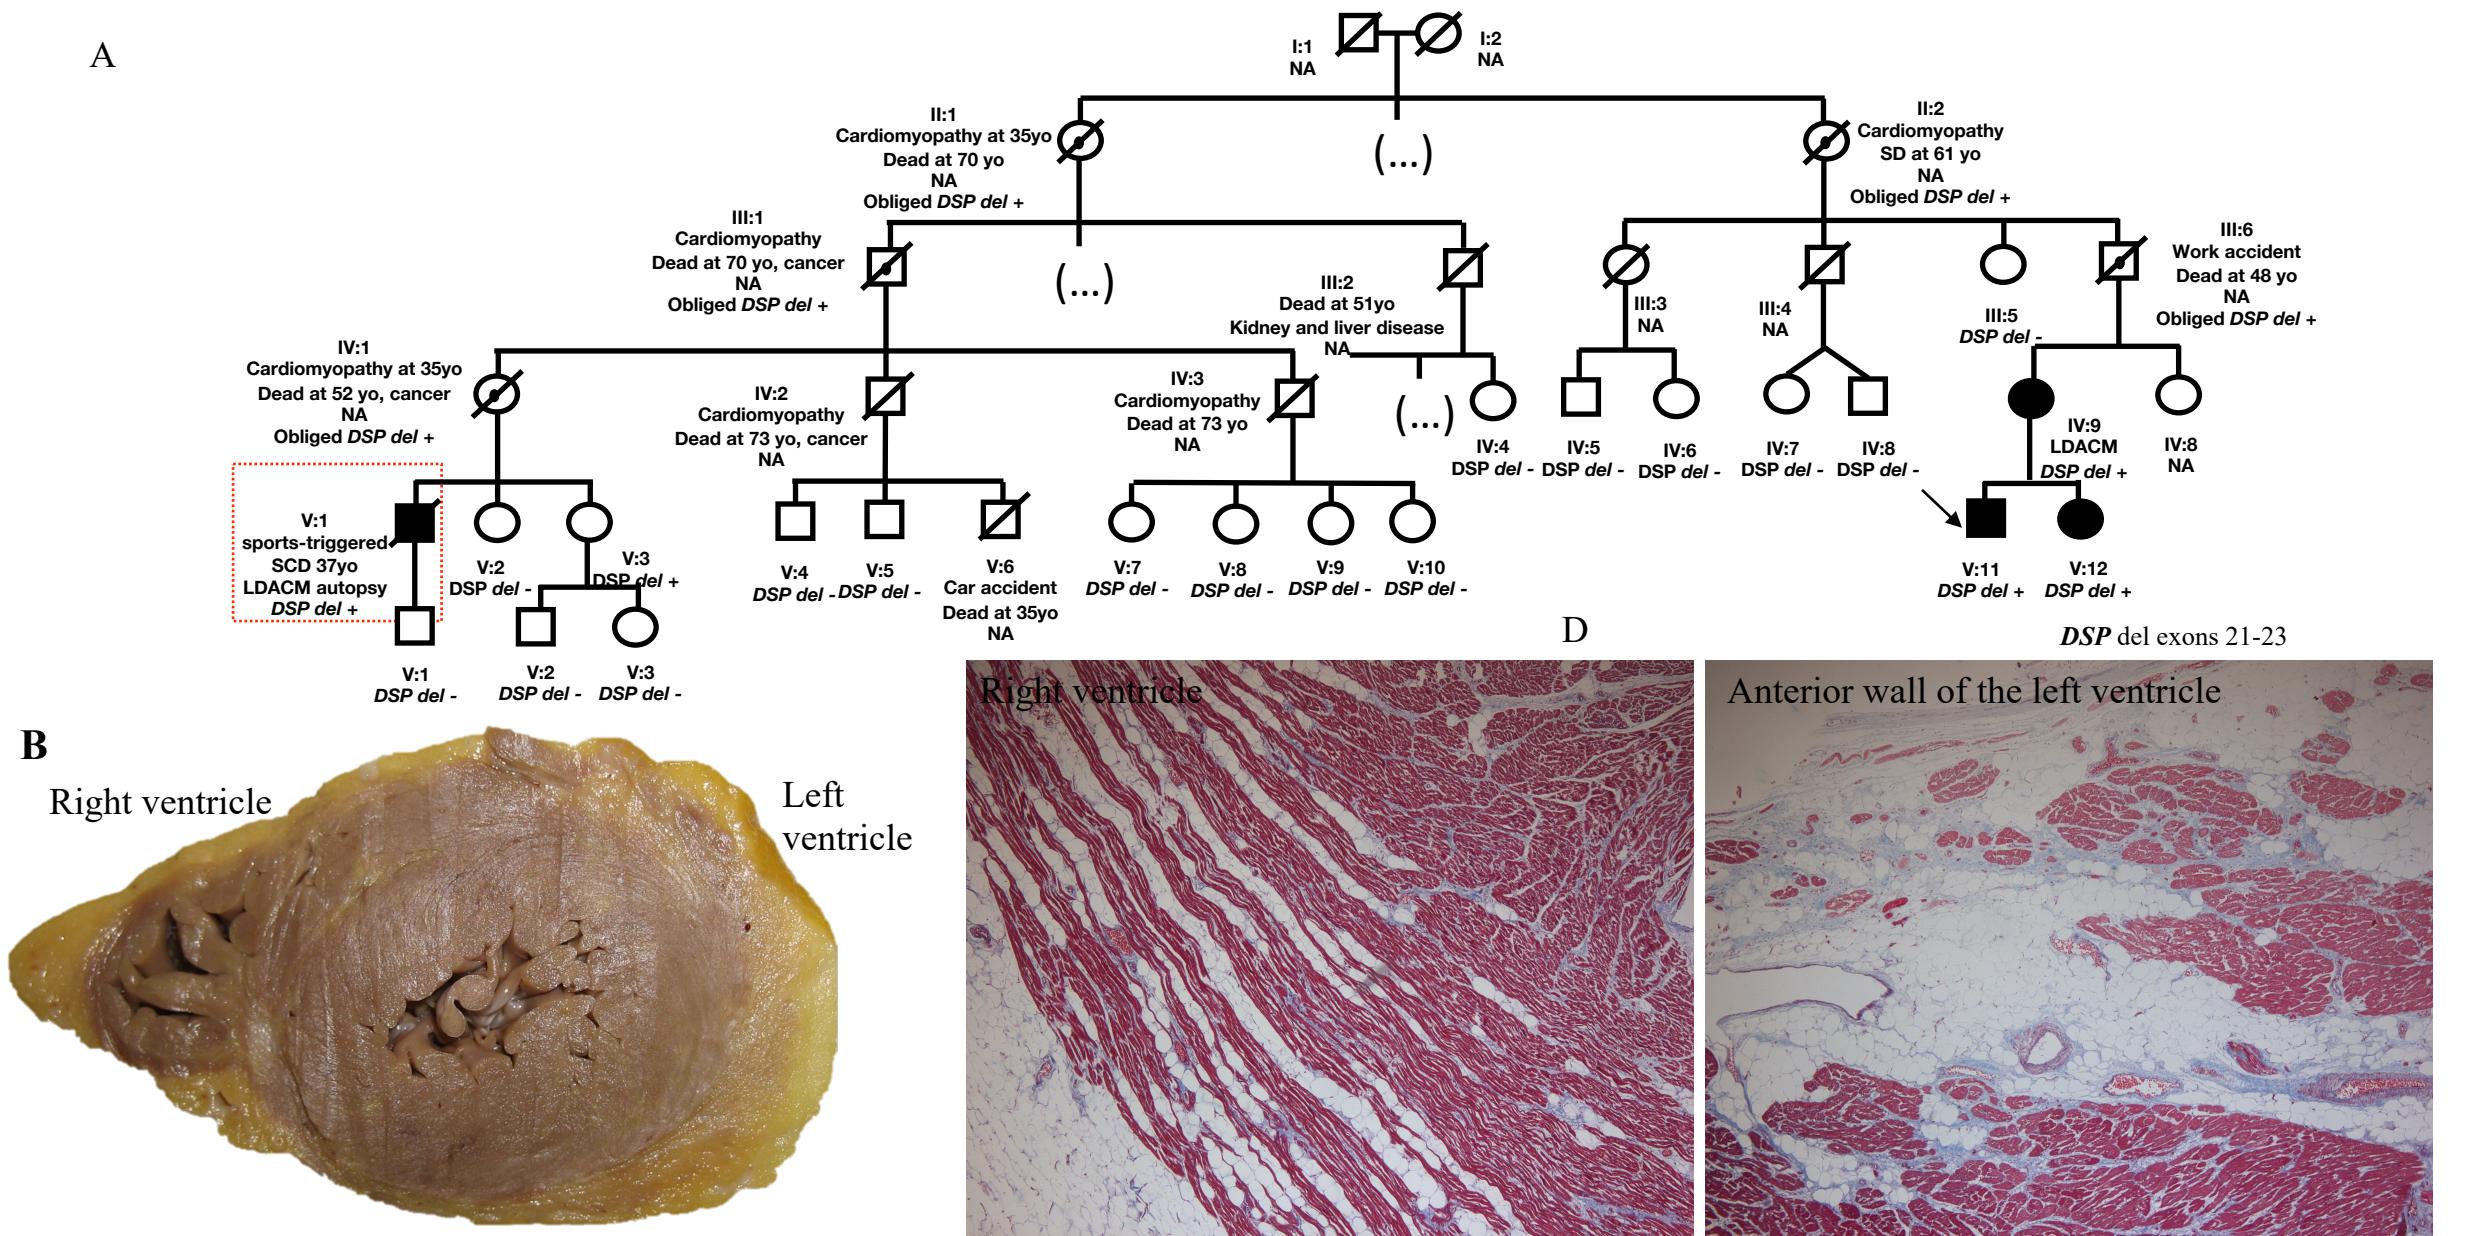

**Online Figure 5. Phenotypic characteristics (validation group):** **A.** Pedigree; The proband was a 37-year old male with a family history of arrhythmogenic cardiomyopathy who carried a deletion mutation in the *DSP* gene. **B.** Cross sectional view of the heart showing epicardial fat and a non-dilated ventricles. **C.** Masson trichrome-stained thin myocardial section from the right ventricle showing epicardial and interstitial adipocytes; **D.** Masson trichrome stained thin left ventricular section showing extensive fibro-adipogenesis. A large deletion involving exons 21-24 of the *DSP* gene was detected by Multiplex ligation-dependent probe amplification. Abbreviations as in Online Figures 1 and 3.

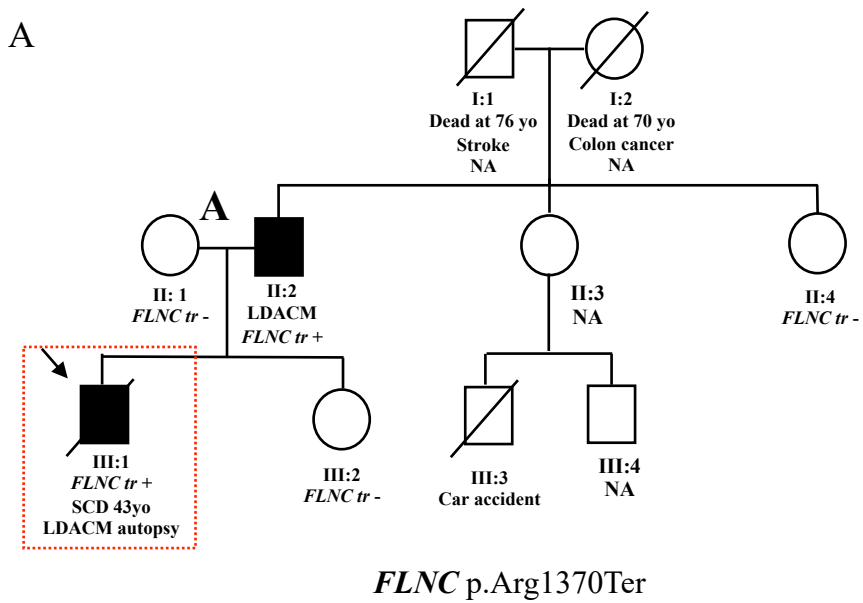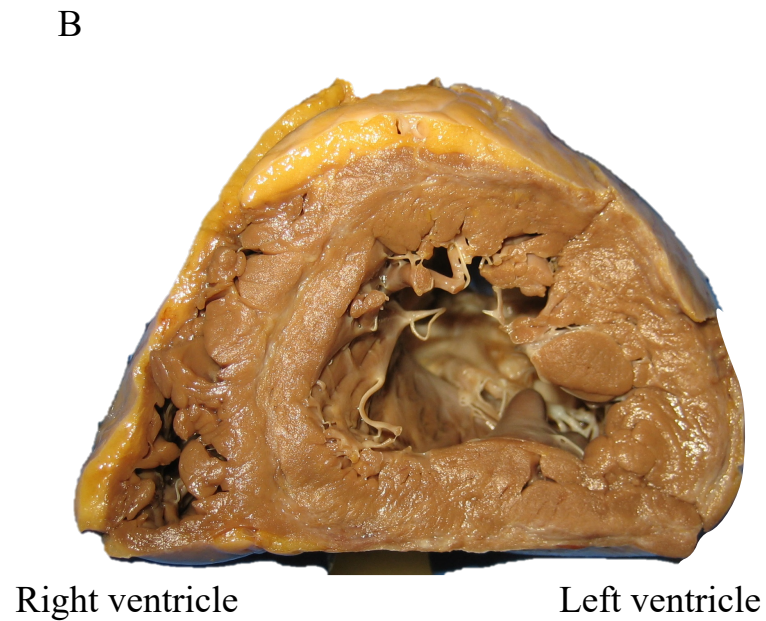

**Online Figure 6. Phenotypic characteristics (replication population):**

**A. Pedigree.** The proband was a 43-year old asymptomatic man with no prior history of cardiovascular disease, who died suddenly during routine activities. **B.** Gross cardiac cross section showing epicardial fat and a normal right and left ventricular cavity size. **C.** Masson trichrome stained thin myocardial section from the right ventricle showing epicardial fat. **D.** Masson trichrome stained thin myocardial section from the lateral wall of left ventricle showing extensive fibrosis. **E.** Thin myocardial section from the anterior wall of the left ventricle showing extensive fibro-adiposis. Genetic analysis led to identification of a truncating mutation p.Arg1370Ter (c.4108C>T) in the *FLNC* gene. Abbreviations as in Online Figure 1 and 3

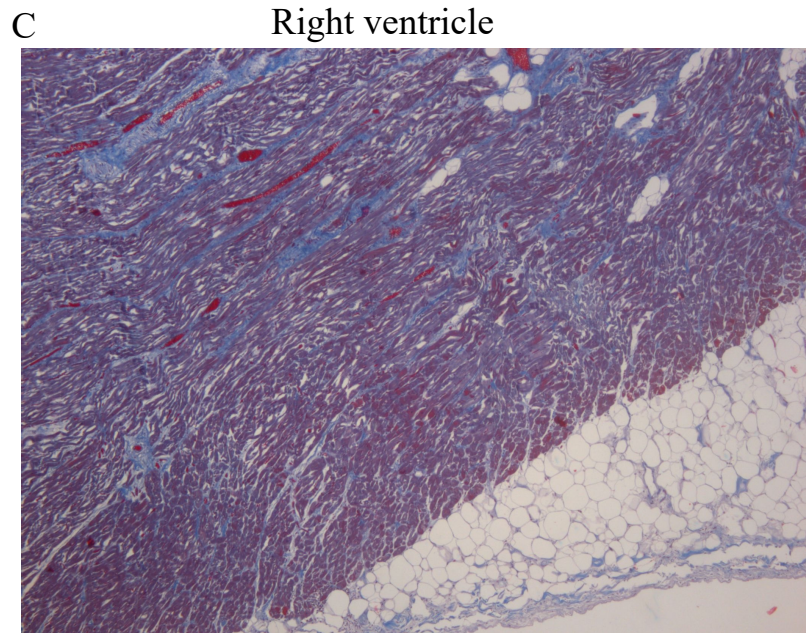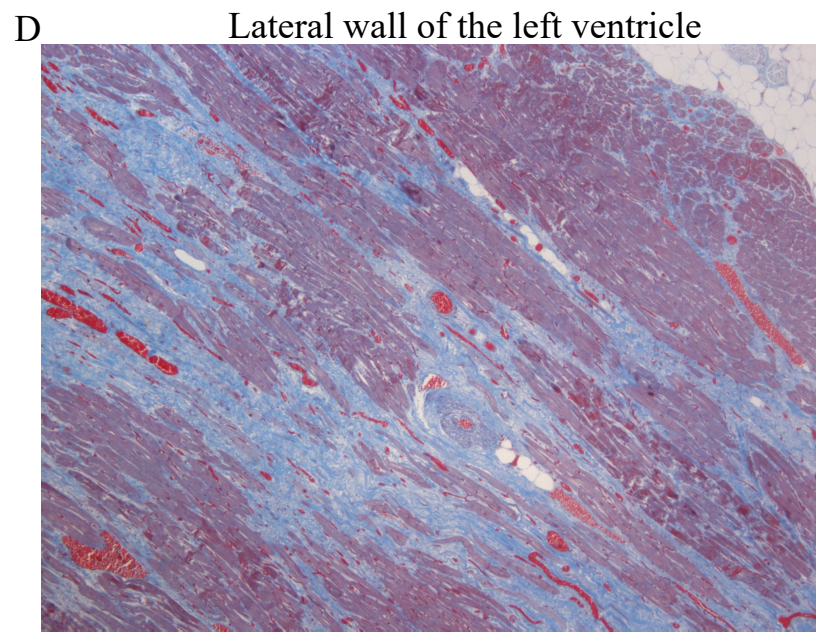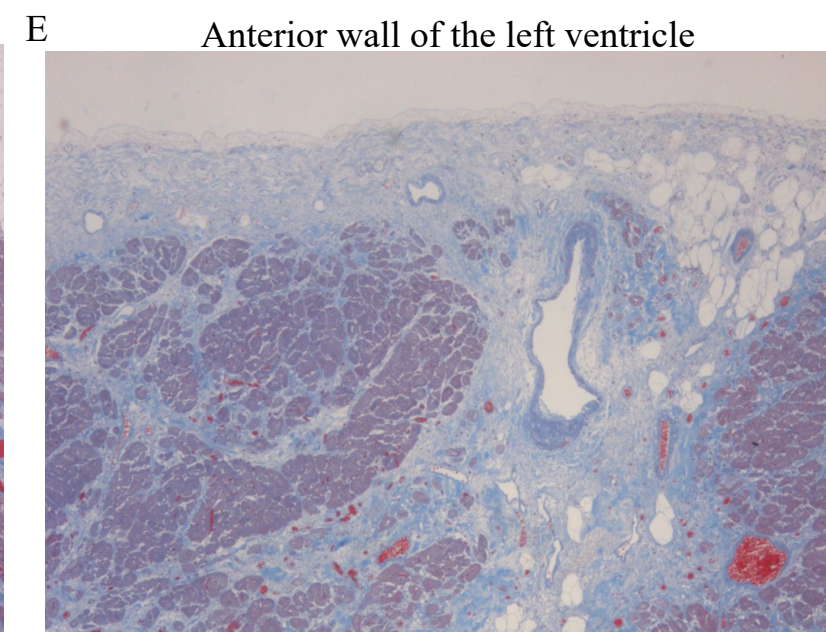

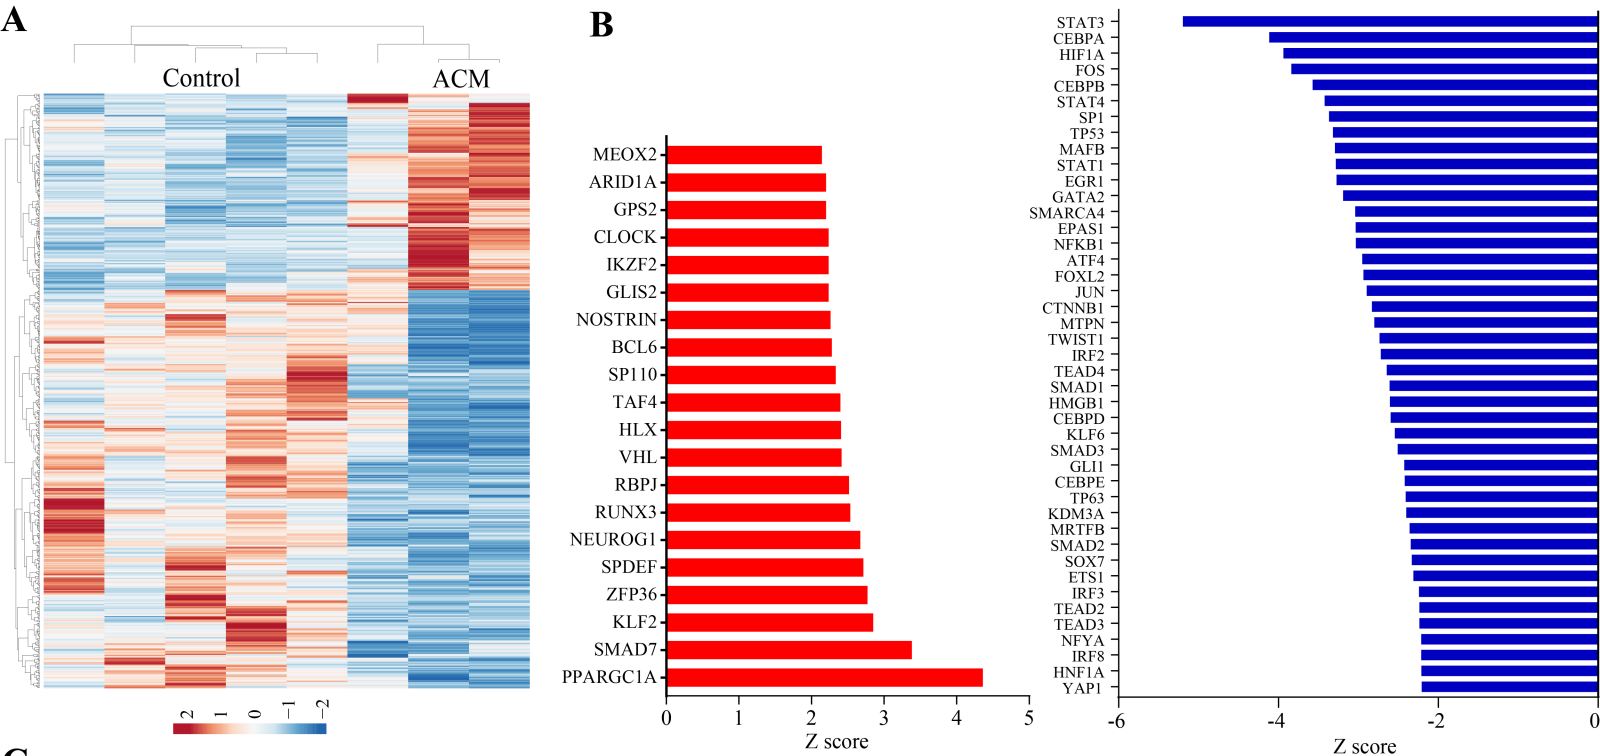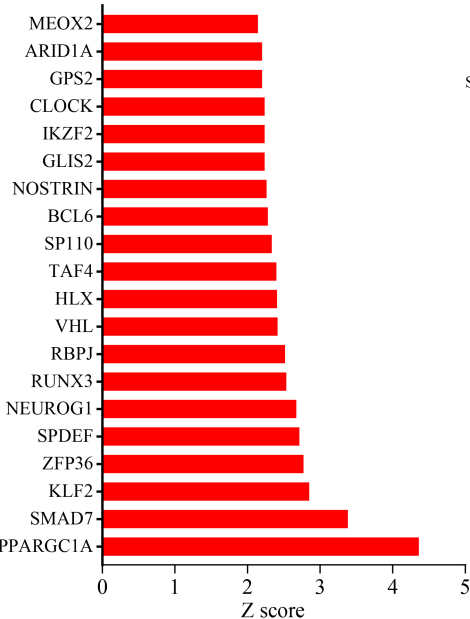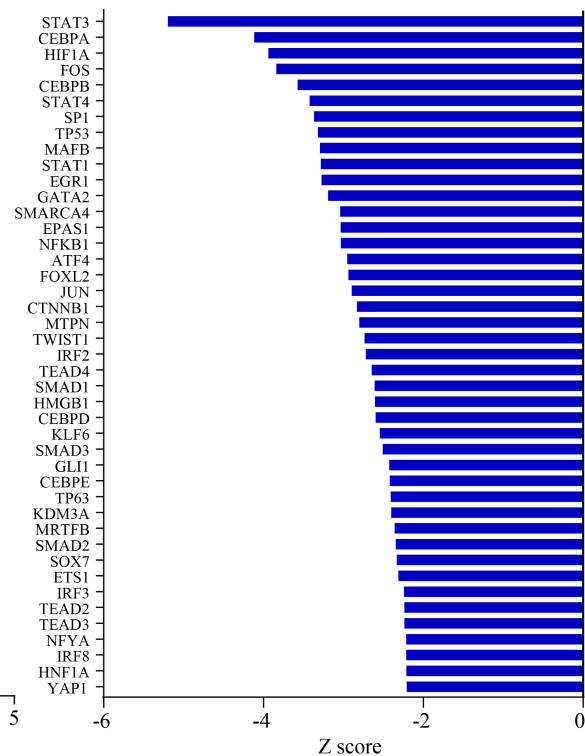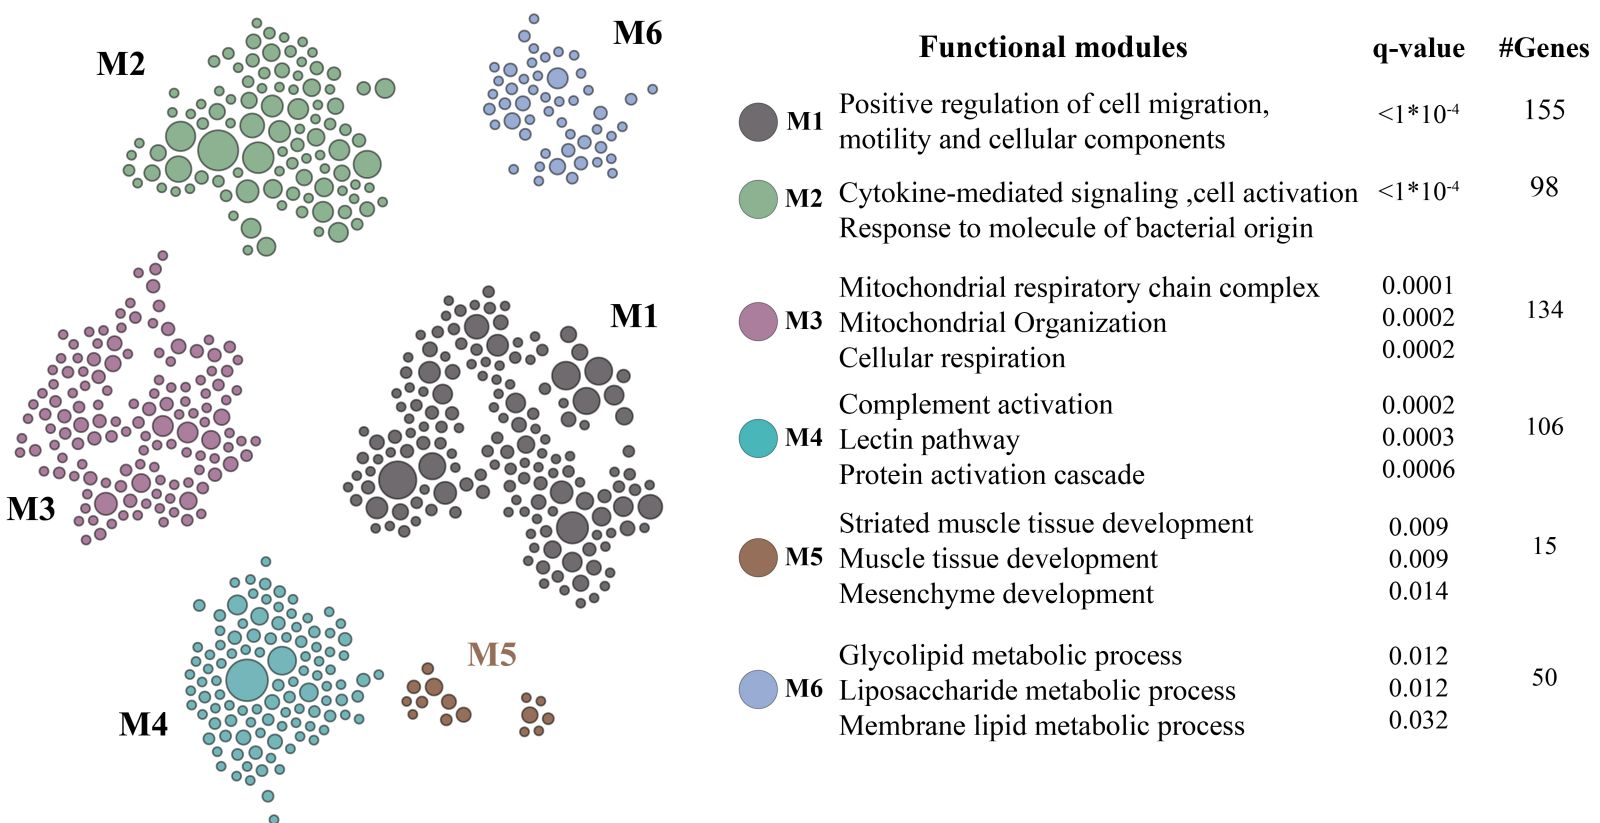

**Online Figure 7.** Differentially expressed genes (DEGs) coding for the secreted proteins (secretome) in the endomyocardial biopsy samples from patients with arrhythmogenic cardiomyopathy (ACM) caused by *DSP* truncation mutation.

**A.** Heat map of the DEGs coding for the secretome.

**B.** Transcriptional regulators of the secretome, predicted to be activated (red) or suppressed (blue).

**C.** Clustering of the secretome based on their biological functions.



**A****Adipogenesis**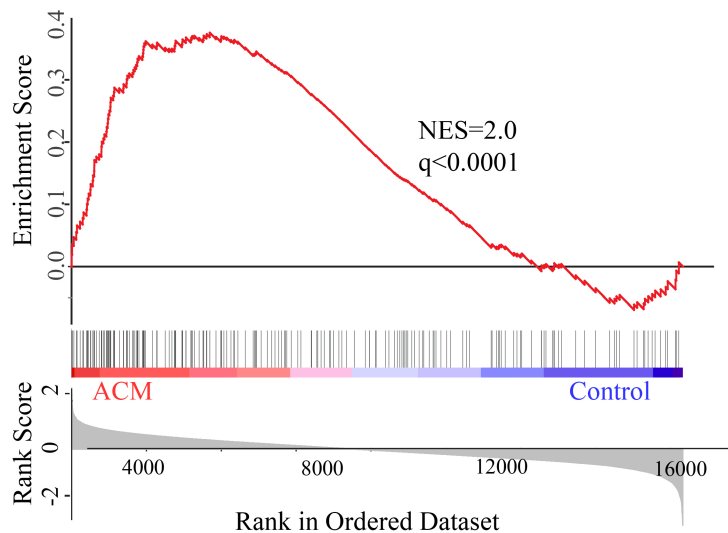**Fatty Acid Metabolism**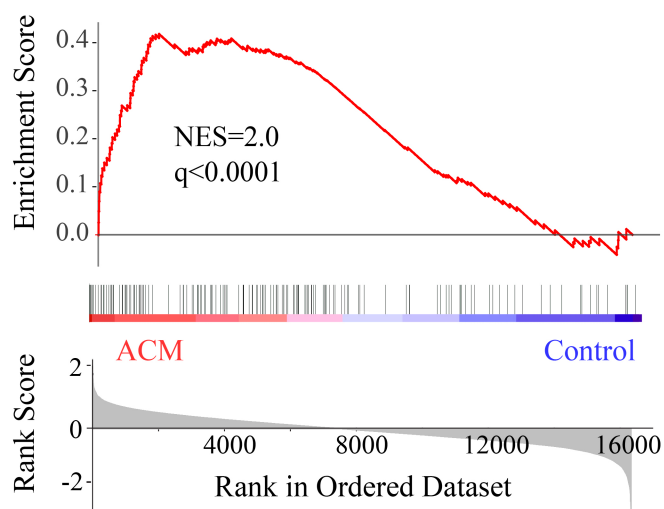**Oxidative Phosphorylation**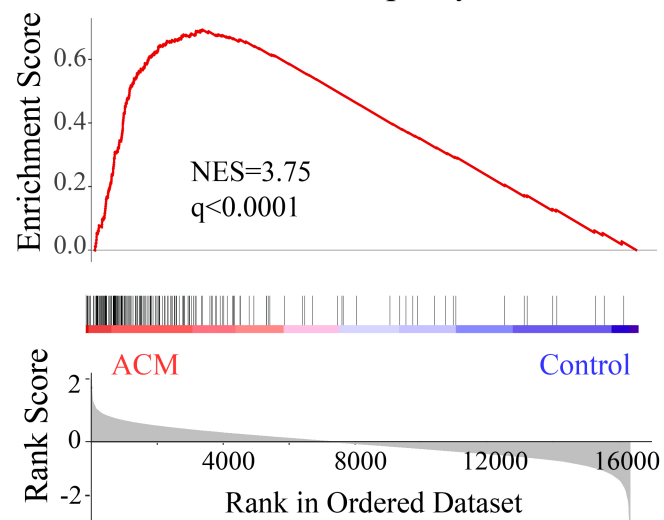**B****Inflammatory response**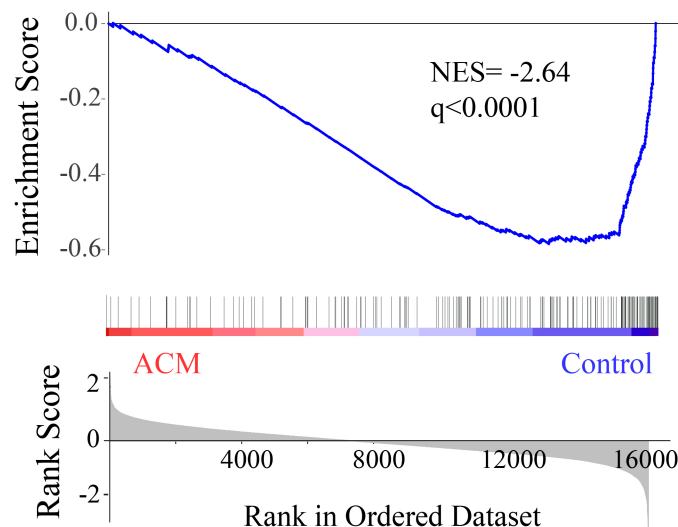**IL6-JAK-STAT3 signaling**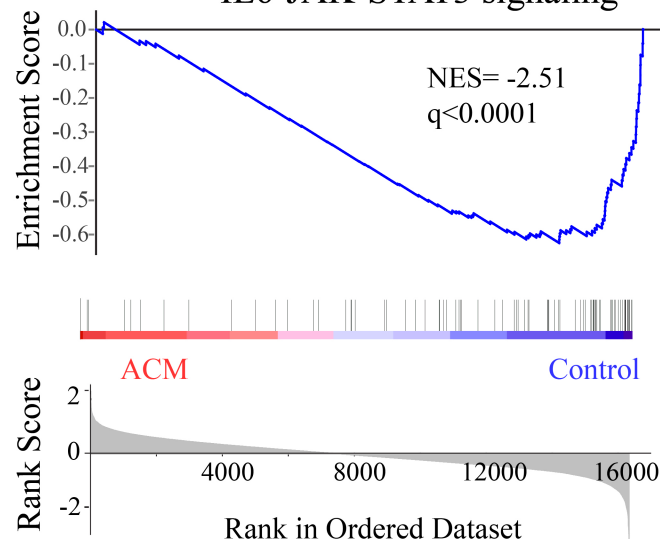

**Online Figure 8. Additional dysregulated biological pathways.** GSEA plots showing Hallmark signature for gene involved in adipogenesis, fatty acid metabolism and oxidative phosphorylation are activated (A), whereas those in inflammatory response and IL6-JAK-STAT3 pathways are suppressed (B).

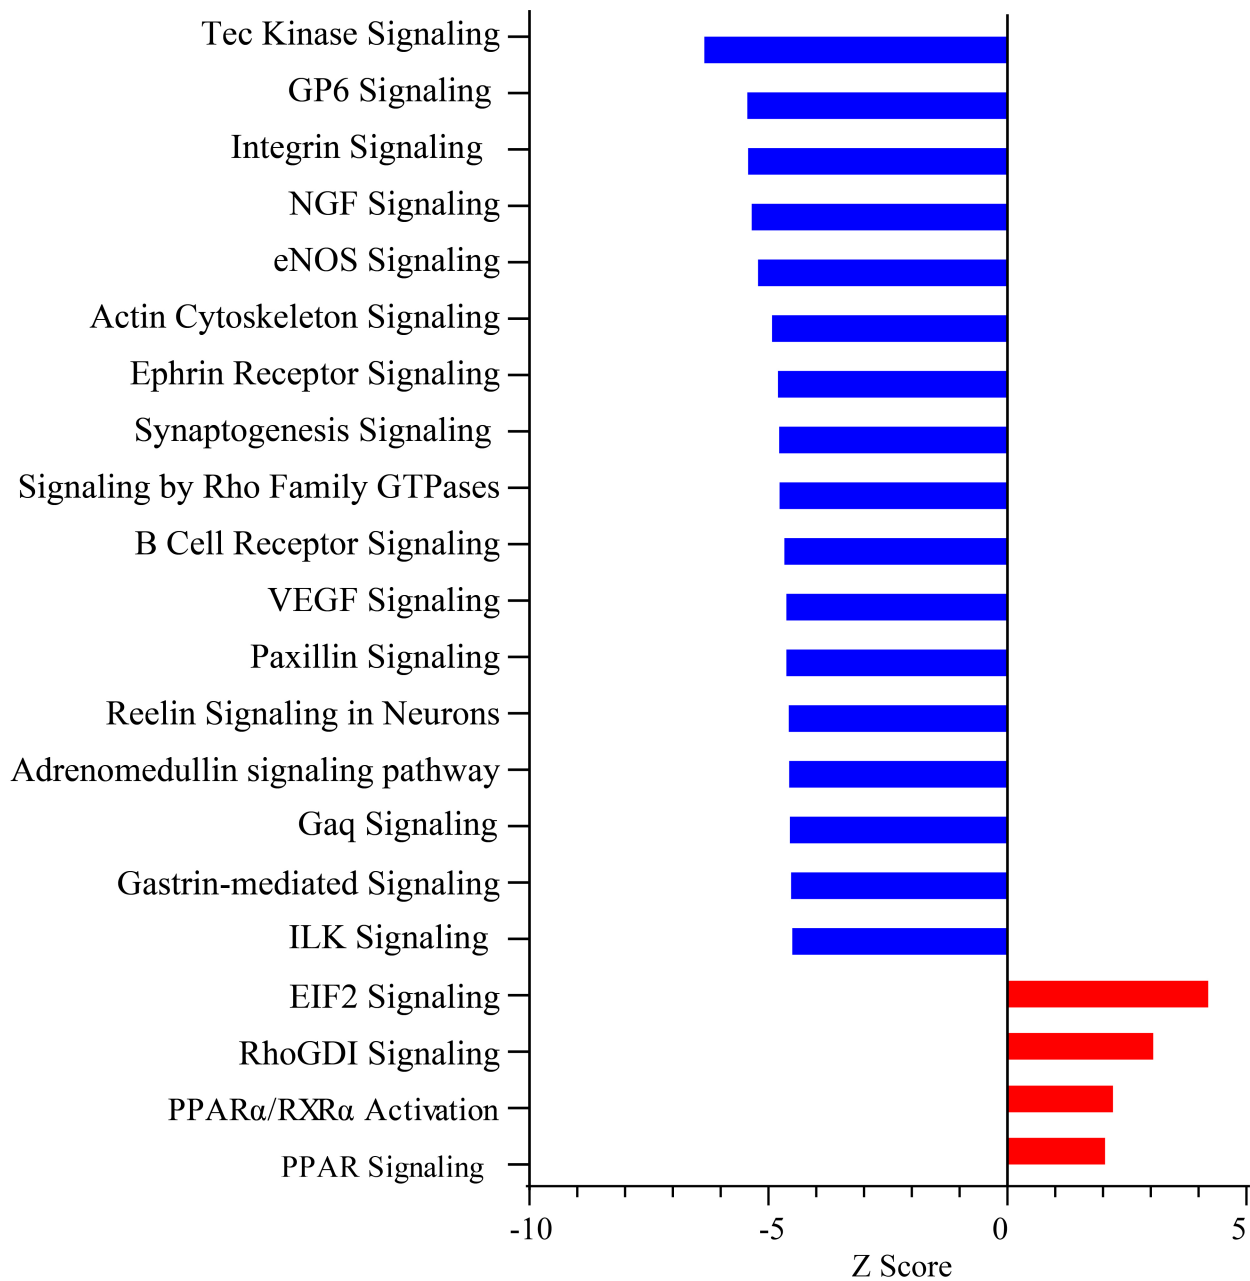

**Online Figure 9.** Canonical signal transduction pathways, as listed in the Ingenuity Pathway Analysis database, predicted to be dysregulated, based on the differentially expressed genes, in the heart in human ACM. Blue indicated suppressed and red activated pathways.

**Online Table 1****Antibodies**

| <b>Antibodies</b>                     | <b>Concentration</b>    | <b>Supplier</b>           | <b>Catalog number</b> |
|---------------------------------------|-------------------------|---------------------------|-----------------------|
| YAP1                                  | 1:1000 (IB), 1:100 (IF) | Cell Signaling Technology | 14074S                |
| TEAD1                                 | 1:200 (IB), 1:200 (IF)  | Santa Cruz                | sc-376113             |
| ANLN                                  | 1:1000 (IB), 1:100 (IF) | Invitrogen                | PA5-84016             |
| TAZ                                   | 1:1000 (IB), 1:200 (IF) | Cell Signaling Technology | 72804S                |
| GAPDH                                 | 1:1000 (IB)             | Cell Signaling Technology | 2118                  |
| KLF4                                  | 1:250 (IB), 1:50 (IF)   | Santa Cruz                | sc-166238             |
| TCF7L2                                | 1:500 (IB), 1:200 (IF)  | Cell Signaling Technology | 2569S                 |
| CDKN1A                                | 1:100 (IB), 1:20 (IF)   | BD Pharmingen             | 556431                |
| CTNNB1                                | 1:1000 (IB), 1:250 (IF) | Cell Signaling Technology | 8480                  |
| DSP                                   | 1:200 (IF)              | Abcam                     | ab71690               |
| GJA1                                  | 1:200 (IF)              | Sigma                     | C6219                 |
| Vimentin                              | 1:250 (IF)              | Abcam                     | ab92547               |
| EP300                                 | 1:1000 (IB)             | Cell Signaling Technology | sc-48343              |
| Cleaved Caspase3                      | 1:1000 (IB)             | Cell Signaling Technology | 9664                  |
| TP53                                  | 1:500 (IB),             | Santa Cruz                | 6243                  |
| Acetyl-TP53 (K382)                    | 1:1000 (IB)             | Cell Signaling Technology | 2525                  |
| p-TP53 (S15)                          | 1: 1000 (IB)            | Cell Signaling Technology | 9284                  |
| Anti-mouse IgG HRP linked antibody    | 1:4000 (IB)             | Cell Signaling Technology | 7076                  |
| Anti-rabbit IgG HRP linked antibody   | 1:2000 (IB)             | Cell Signaling Technology | 7074                  |
| Goat anti-mouse IgG, Alexa Fluor 488  | 1:1000 (IF)             | Invitrogen                | A11029                |
| Goat anti-Rabbit IgG, Alexa Fluor 488 | 1:1000 (IF)             | Invitrogen                | A11034                |
| Goat anti-Rabbit IgG, Alexa Fluor 594 | 1:1000 (IF)             | Invitrogen                | A11012                |

**Online Table 2**

**Baseline Characteristics of the Patients**

| <b>Demographics</b>                             |                   |                               |          |
|-------------------------------------------------|-------------------|-------------------------------|----------|
| Sex                                             | Male              | Female                        | Male     |
| Age (years)                                     | 30                | 17                            | 45       |
| Height (cm)                                     | 187               | 170                           | 175      |
| Weight (kg)                                     | 78                | 54                            | 70       |
| BSA (m <sup>2</sup> )                           | 2.0               | 1.6                           | 1.8      |
| BMI (kg/m <sup>2</sup> )                        | 22.3              | 18.7                          | 22.0     |
| Proband                                         | No                | No                            | No       |
| Family history of cardiomyopathy                | Yes               | Yes                           | Yes      |
| <b>Medical history</b>                          |                   |                               |          |
| Cardiac arrest                                  | No                | No                            | Yes      |
| PVCs >500/24h                                   | Yes               | Yes                           | Yes      |
| Non-sustained VT                                | No                | Yes                           | Yes      |
| Sustained VT/VF                                 | No                | No                            | Yes      |
| Atrial fibrillation                             | No                | No                            | No       |
| Syncope                                         | Yes               | No                            | No       |
| ICD implantation                                | Yes               | Yes                           | Yes      |
| Time to first ICD shock (total follow up years) | 6 years (7 years) | No shock (10 years after ICD) | Yes (NA) |
| Radio frequency catheter ablation               | No                | No                            | No       |
| Ischemic heart disease                          | No                | No                            | No       |
| Diabetes mellitus                               | No                | No                            | No       |
| Hypertension                                    | No                | No                            | No       |
| Dyslipidemia                                    | No                | No                            | No       |
| Ex-smoker & Current smoking                     | No                | No                            | No       |
| <b>History and Physical examination</b>         |                   |                               |          |
| Heart rate (bpm)                                | 64                | 75                            | 50       |
| Systolic blood pressure (mmHg)                  | 137               | 80                            | 100      |
| Diastolic blood pressure (mmHg)                 | 82                | 50                            | 60       |
| Chest pain/tightness                            | No                | No                            | No       |
| Palpitations                                    | Yes               | Yes                           | Yes      |
| NYHA Functional class                           | I                 | I                             | I        |
| <b>Medications</b>                              |                   |                               |          |
| Beta-blockers                                   | Yes               | No                            | Yes      |
| Amiodarone                                      | No                | No                            | Yes      |
| Flecainide                                      | No                | No                            | No       |
| Sotalol                                         | No                | Yes                           | No       |
| Other anti-arrhythmic drugs                     | No                | No                            | No       |
| RAAS drugs                                      | Yes               | No                            | Yes      |
| <b>ARVC Task force criteria</b>                 |                   |                               |          |
| <b>Structural</b>                               |                   |                               |          |
| Major                                           | No                | No                            | No       |
| Minor                                           | No                | No                            | No       |

| <b>Depolarization</b>                                    |                                                                 |                                            |                                                           |
|----------------------------------------------------------|-----------------------------------------------------------------|--------------------------------------------|-----------------------------------------------------------|
| ε wave (major)                                           | No                                                              | No                                         | No                                                        |
| TAD $\geq$ 55ms (minor)                                  | Yes                                                             | Yes                                        | No                                                        |
| Late Potentials on SAECG at 40 Hz filter (minor)         | NA                                                              | NA                                         | Yes                                                       |
| <b>Repolarization</b>                                    |                                                                 |                                            |                                                           |
| T wave inversion V1-V3 with QRS duration <120 ms (major) | No                                                              | No                                         | Yes                                                       |
| T wave inversion V1-V2 with QRS duration <120 ms (minor) | No                                                              | No                                         | No                                                        |
| T wave inversion V4-V6 (minor)                           | No                                                              | No                                         | Yes                                                       |
| T wave inversion V1-V4 with complete RBBB (major)        | No                                                              | No                                         | Yes                                                       |
| <b>Arrhythmias</b>                                       |                                                                 |                                            |                                                           |
| VT: LBBB plus superior axis (major)                      | No                                                              | No                                         | Yes                                                       |
| VT: LBBB plus inferior or unknown axis (minor)           | No                                                              | No                                         | No                                                        |
| PVCs count > 500/24h (minor)                             | Yes                                                             | Yes                                        | Yes                                                       |
| <b>Pathogenic variants</b>                               |                                                                 |                                            |                                                           |
| Pathogenic ACM mutation carrier (major)                  | <i>DSP</i> c.3115dupG (p.Glu1039Glyfs*15)                       | <i>DSP</i> c. 5318delT (p. Leu1773Tyrfs*8) | <i>DSP</i> c.1339C>T (p. Gln447*)                         |
| <b>Electrocardiography</b>                               |                                                                 |                                            |                                                           |
| T-wave inversion in V5–V6 $\pm$ V4, I, aVL               | No                                                              | No                                         | No                                                        |
| T-wave inversion in II, III, aVF                         | No                                                              | No                                         | Yes                                                       |
| T-wave inversion in V1–V6                                | No                                                              | No                                         | No                                                        |
| Left axis deviation (QRS axis < -30°)                    | No                                                              | No                                         | No                                                        |
| Leftward QRS axis (-30° < QRS axis < 0)                  | No                                                              | No                                         | No                                                        |
| <b>Echocardiography</b>                                  |                                                                 |                                            |                                                           |
| IVST (mm)                                                | 10                                                              | 9                                          | 10                                                        |
| LVPWT (mm)                                               | 7                                                               | 7                                          | 8                                                         |
| Maximum wall thickness (mm)                              | 10                                                              | 9                                          | 10                                                        |
| LVEDD (mm)                                               | 54                                                              | 42                                         | 60                                                        |
| LVESD (mm)                                               | 37                                                              | 29                                         | 48                                                        |
| LVEF (%)                                                 | 58                                                              | 70                                         | 43                                                        |
| RV dilatation                                            | Non dilated RV                                                  | Non dilated RV                             | Non dilated RV                                            |
| RVOT (mm)                                                | 29                                                              | NA                                         | 31                                                        |
| RV systolic function                                     | Normal, FAC:50.7%, TAPSE: 27 mm                                 | Normal RV function                         | Normal RV function                                        |
| <b>Cardiac magnetic resonance</b>                        |                                                                 |                                            |                                                           |
| LVEDVi (ml/m <sup>2</sup> )                              | 91                                                              | 81                                         | 109                                                       |
| LVEF (%)                                                 | 63                                                              | 63                                         | 46                                                        |
| LV LGE                                                   | Yes (subepicardial lateral, inferior, apical, and septal walls) | Yes (subepicardial and concentric)         | Yes (extensive: global subepicardial, localized inferior, |

|                              |                                                  |    |                                                                                      |
|------------------------------|--------------------------------------------------|----|--------------------------------------------------------------------------------------|
|                              |                                                  |    | posterior, lateral, and anterior walls. Patchy: anterior septum at mid-apical level) |
| LV wall motion abnormalities | No                                               | No | Yes (apex mainly)                                                                    |
| RVEF (%)                     | 45                                               | 56 | 58                                                                                   |
| RVEDVi, (ml/m <sup>2</sup> ) | 91                                               | 71 | NA                                                                                   |
| RV LGE                       | No                                               | No | No                                                                                   |
| RV wall motion abnormalities | Yes (small dyskinetic areas at the RV free wall) | No | No                                                                                   |

**Abbreviations:** BSA: body surface area; BMI: body mass index; PVCs: premature ventricular contractions; VT: ventricular tachycardia; VF: ventricular fibrillation; ICD: implantable cardioverter-defibrillator; NYHA: New York Heart Association; RAAS: renin-angiotensin-aldosterone system; TAD: terminal activation duration; SAECG: signal-averaged electrocardiography; RBBB, right bundle branch block; LBBB, left bundle branch block; IVST: interventricular septal thickness; LVPWT: left ventricular posterior wall; LVEDD: left ventricular end-diastolic diameter; LVESD: left ventricular end-systolic diameter; LVEF: left ventricular ejection fraction; RVEF: right ventricular ejection fraction; LV: left ventricle; RV: right ventricle; FAC: fractional area change; RVOT: right ventricular outflow tract; TAPSE: tricuspid annular plane systolic excursion; LVEDVi: left ventricular end-diastolic volume index; RVEDVi: right ventricular end-diastolic volume index; LGE: late gadolinium enhancement; SCD: Sudden cardiac death

Online Table 3

List of Mutations (Pathogenic Variants)

| Tissue | Demographics |     |        | Mutation      |                      |                                             |                                   |
|--------|--------------|-----|--------|---------------|----------------------|---------------------------------------------|-----------------------------------|
| No.    | Source       | Age | Sex    | Gene          | Reference transcript | DNA sequence change                         | Amino acid change                 |
| 1      | Biopsy       | 30  | Male   | <i>DSP</i>    | NM_004415.4          | c.3115dupG                                  | p.Glu1039Glyfs*15                 |
| 2      | Biopsy       | 17  | Female | <i>DSP</i>    | NM_004415.4          | c.5318delT                                  | p.Leu1773Tyrfs*8                  |
|        |              |     |        | <i>DSC2</i>   | NM_024422.6          | c.1073C>T                                   | p.Thr358Ile<br>(rs139399951)      |
| 3      | Biopsy       | 45  | Male   | <i>DSP</i>    | NM_004415.4          | c.1339C>T                                   | p.Gln447*                         |
| 4      | Autopsy      | 37  | Male   | <i>DSP</i>    | NM_004415.4          | c.2878-46_6599del<br>(Chr6:7577966-7584094) | Deletion of intron 21-<br>exon 23 |
| 5      | Autopsy      | 23  | Male   | <i>PKP2</i>   | NM_001005242.3       | c.2013delC                                  | p.Lys672Argfs*12                  |
|        |              |     |        | <i>DSG2</i>   | NM_001943.5          | c.523+2_523+3insT                           |                                   |
| 6      | Autopsy      | 21  | Male   | <i>PKP2</i>   | NM_001005242.3       | c.235C>T                                    | p.Arg79*                          |
| 7      | Autopsy      | 43  | Male   | <i>FLNC</i>   | NM_001458.5          | c.4108C>T                                   | p.Arg1370*                        |
| 8      | Autopsy      | 52  | Male   | <i>TMEM43</i> | NM_024334.3          | c.1073C>T                                   | p.Ser358Leu                       |
